# Supplementary material
Source: PubMed Central journal article supplement (PMC2781502)

## SUPPLEMENTAL FIGURES

Supplemental Figure 1: A) Schematic overview of Notch1 constructs used in this study and B) location of different carboxy-terminal epitope tags.

Supplemental Figure 2: Developmental gain of function Notch1 mutants are cleaved at Val1711. A) Lysates from HEK293 cells transfected with LNR 6Myc constructs with the indicated anti-neurogenic gain of function mutations. B) S3 cleavage assays with Notch1 LNR-GV16 fusions constructs in NIH-3T3 cells. Whereas wild type LNR proteins are only weakly active LNR mutant Notch proteins are highly active and cleaved at Val1744 and Val1711. Note the AV>VH is an activating mutation, but cannot be recognized by the Val1711 antibody.

Supplemental Figure 3: NECD or NICD do not influence cleavage at Val1711. A) HEK293 cells transfected with Notch1  $\Delta E$  6Myc molecules. Wild type  $\Delta E$  is efficiently cleaved at Val1711 and Val1744, the  $\Delta E$  AV>VH mutant shows comparable cleavage at Val1744. Val1711 cleavage cannot be detected in this mutant. B) Immunoblot showing that HEK293 transfected Notch1  $\Delta ice$  6Myc molecules, lacking the extracellular as well as the intracellular domain, are very efficiently cleaved at Val1711 and Val1744. C) Notch-CSL transcription reporter assay in transfected HeLa cells showing equal activity of wild type  $\Delta E$  and  $\Delta E$  AV>VH mutant, representative of at least two independent experiments in triplicate.

Supplemental Figure 4: S2 cleavage site mutants are cleaved at a different position. Immunoblot showing that a half-site mutant expressed in HEK293 cells AV>EV, still harboring the Val1711 epitope, is not cleaved at Val1711. Both S2 site mutants show Val1744-NICD cleavage and are gain of function mutants. Arrow indicates the S2 cleavage position in the Notch1 extracellular domain.

Supplemental Figure 5: ADAMs 9, 12 and 15 are not involved in Val1711 cleavage. A) *Adam9/12/15* triple knock-out (TKO) cells were transduced with Jagged1 retrovirus and cell lysates were analyzed by immunoblotting. Jagged1 efficiently induces Notch1 receptor cleavage at Val1711 and Val1744 in *Adam9/12/15* TKO cells. B) Lysates from OP9 wild type or ligand expressing cells co-cultured with *Adam9/12/15* TKO cells. Ligand efficiently induces Notch1 receptor cleavage at Val1711 and Val1744 in the combined absence of ADAMs 9, 12 and 15.

Supplemental Figure 6: Non-metalloprotease inhibitors do not inhibit S2 cleavage at Val1711. Lysates from HEK293 cells transfected with LNR L1594P 6Myc cultured in the presence of broad-spectrum serine, cysteine or aspartyl protease inhibitors. Only the broad spectrum MPi GM6001 can block Val1711 cleavage.

S1A

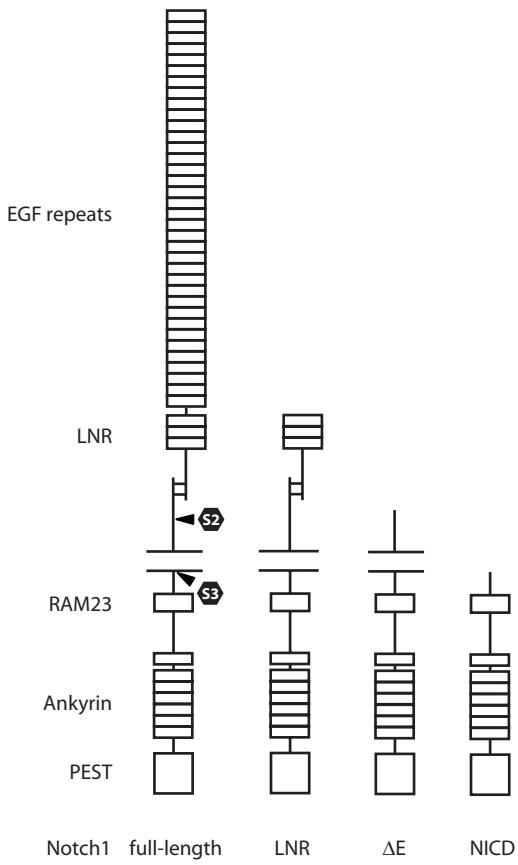

S1B

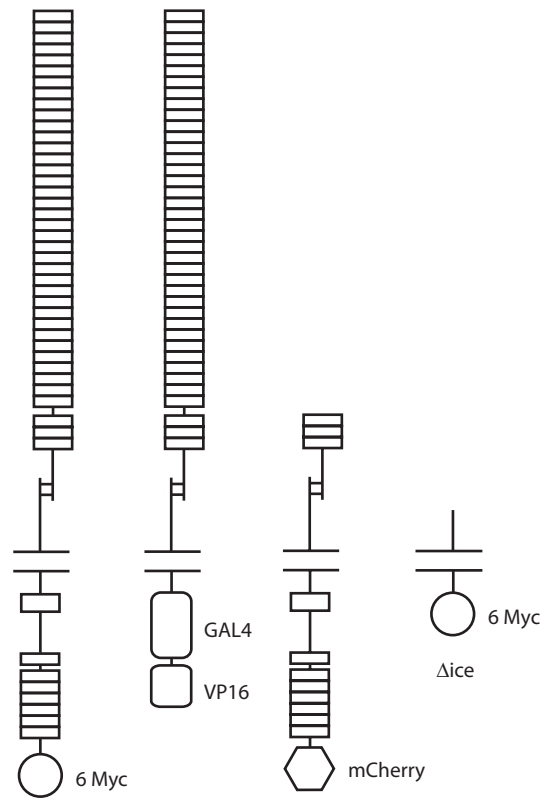

S2A

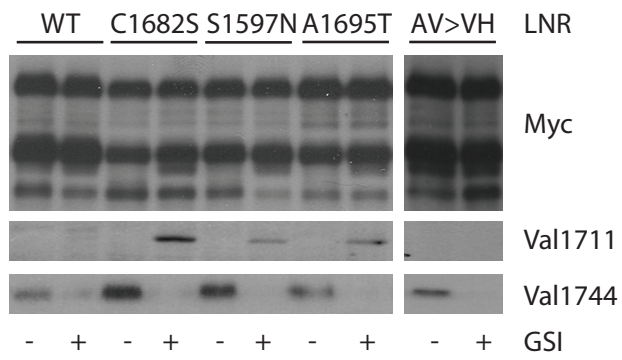

S2B

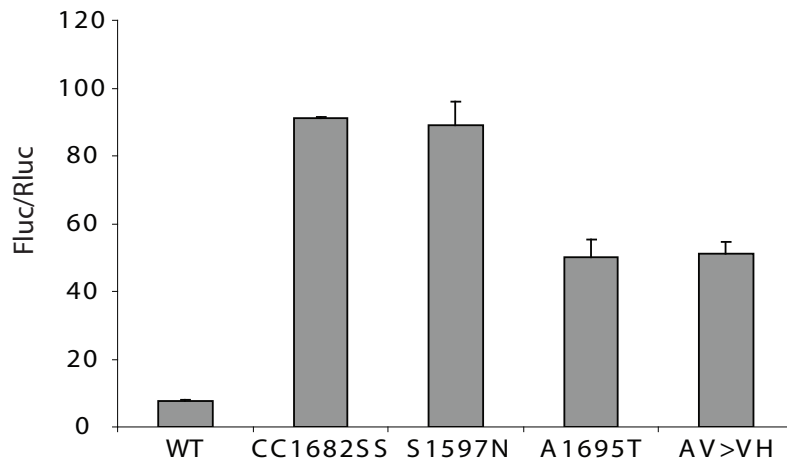

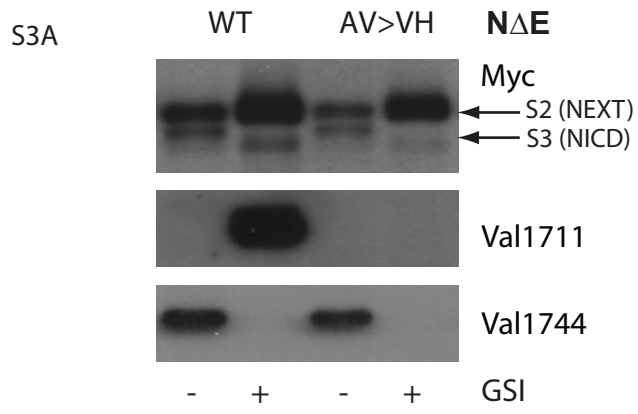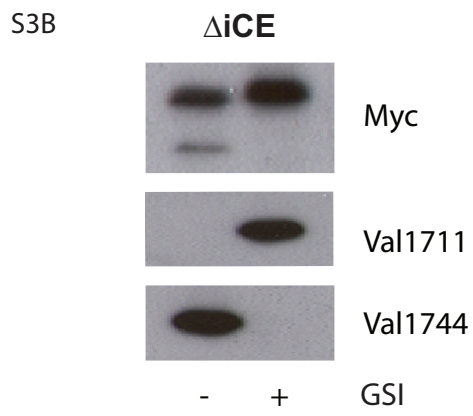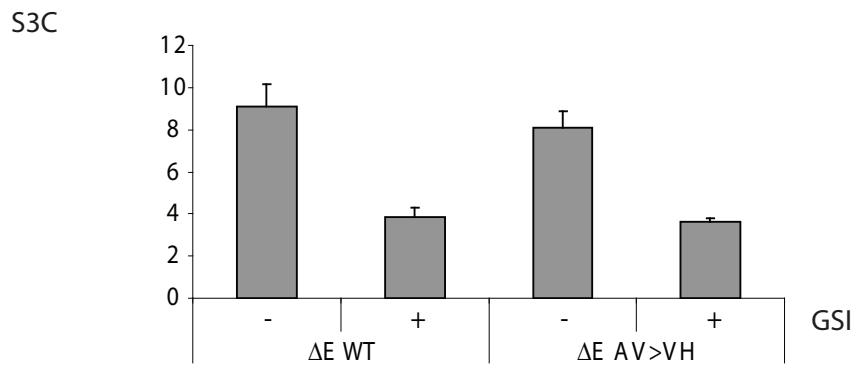

S4

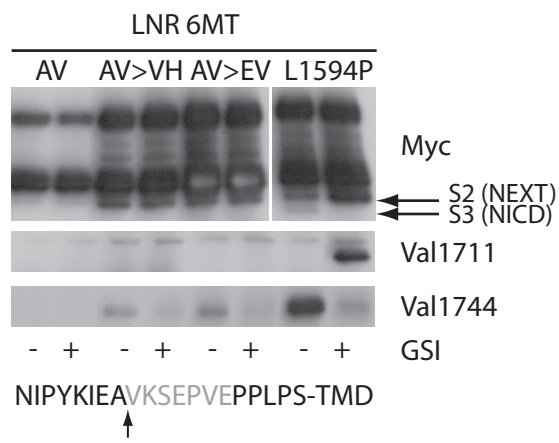

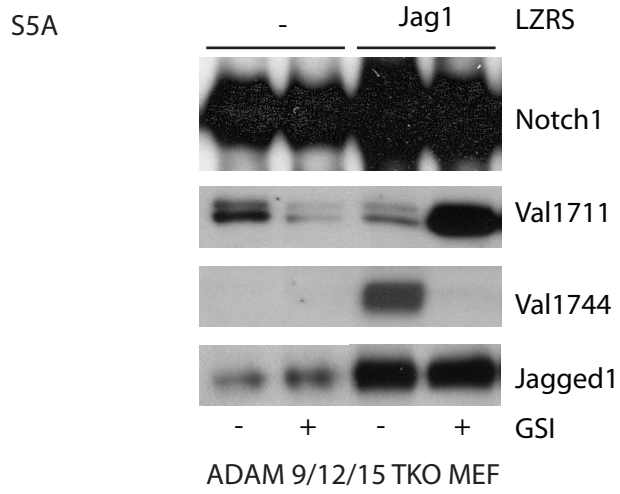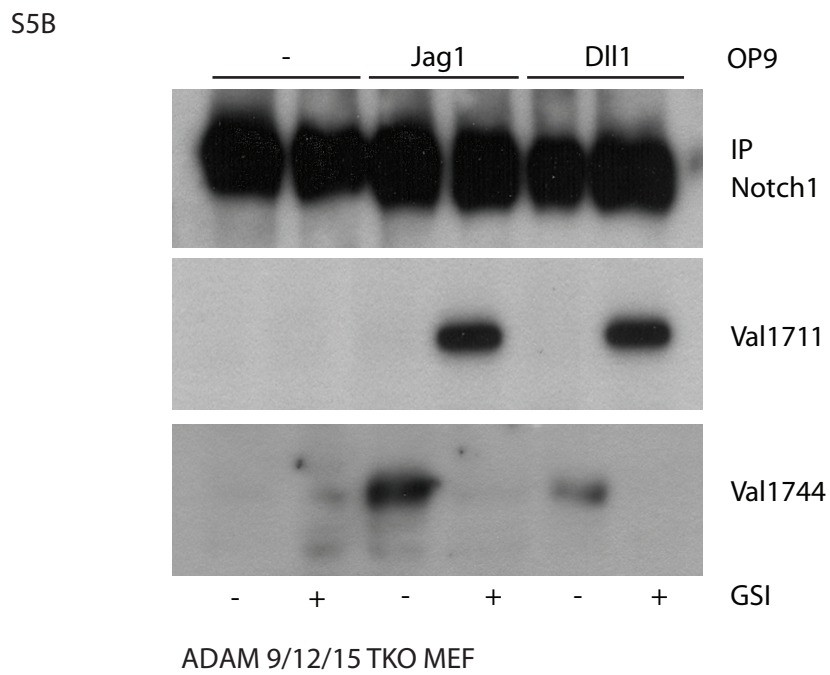

Supplement: supp_M109.006775_jbc.M109.006775-1.pdf [file supp_M109.006775_jbc.M109.006775-1.pdf]
